# Supplementary material for: Combining Bayesian optimization and automation to simultaneously optimize reaction conditions and routes
Source: Royal Society of Chemistry journal article supplement (doi:10.1039/d3sc05607d), 2024-01-01

1-(iodoethyl)-2-methylbenzene 254nm

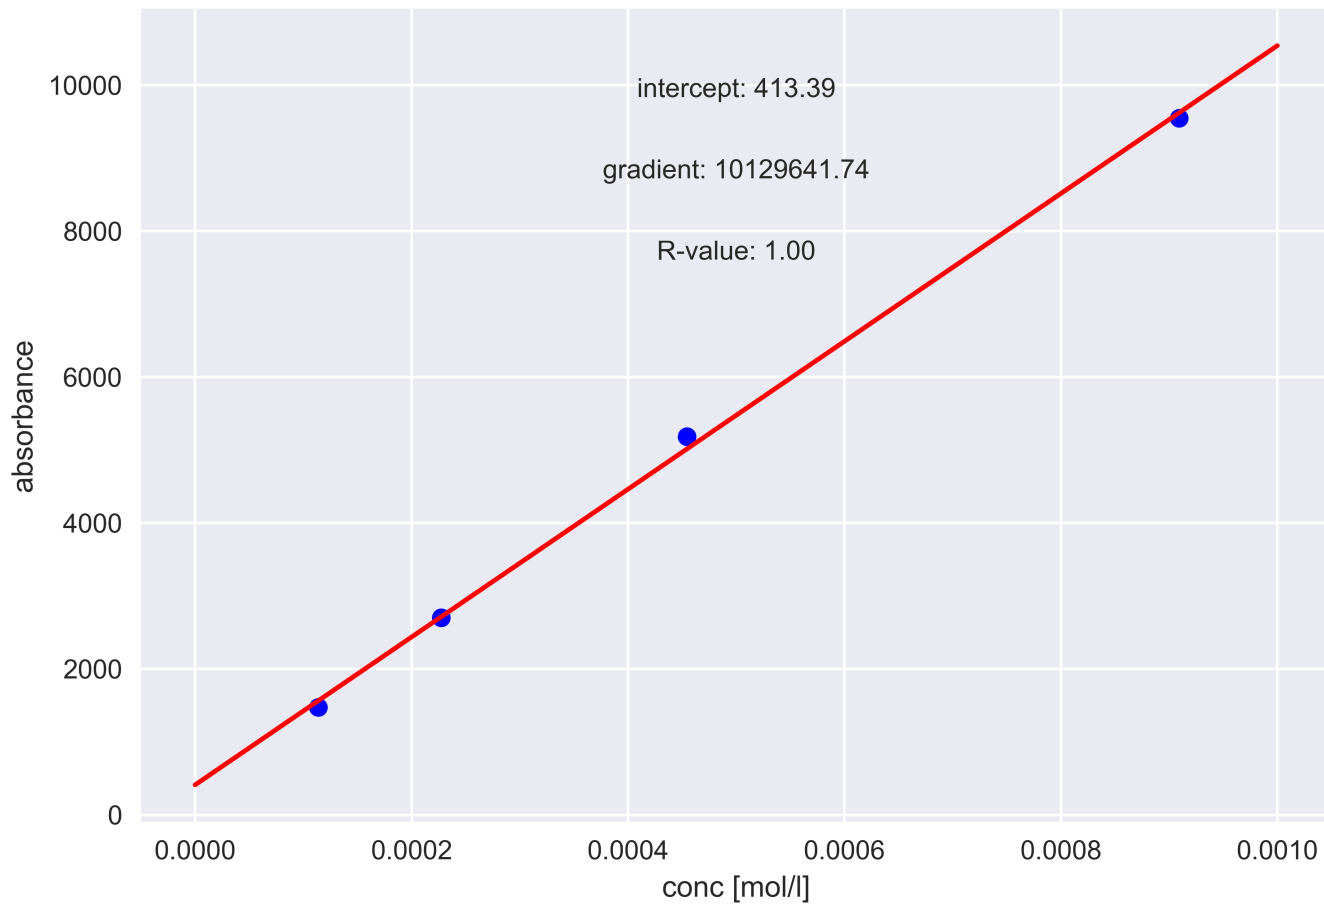

Supplement: d3sc05607d13.pdf [file d3sc05607d13.pdf]
