# Supplementary material for: Combining Bayesian optimization and automation to simultaneously optimize reaction conditions and routes
Source: Royal Society of Chemistry journal article supplement (doi:10.1039/d3sc05607d), 2024-01-01
Supplement: d3sc05607d19.pdf [file d3sc05607d19.pdf]

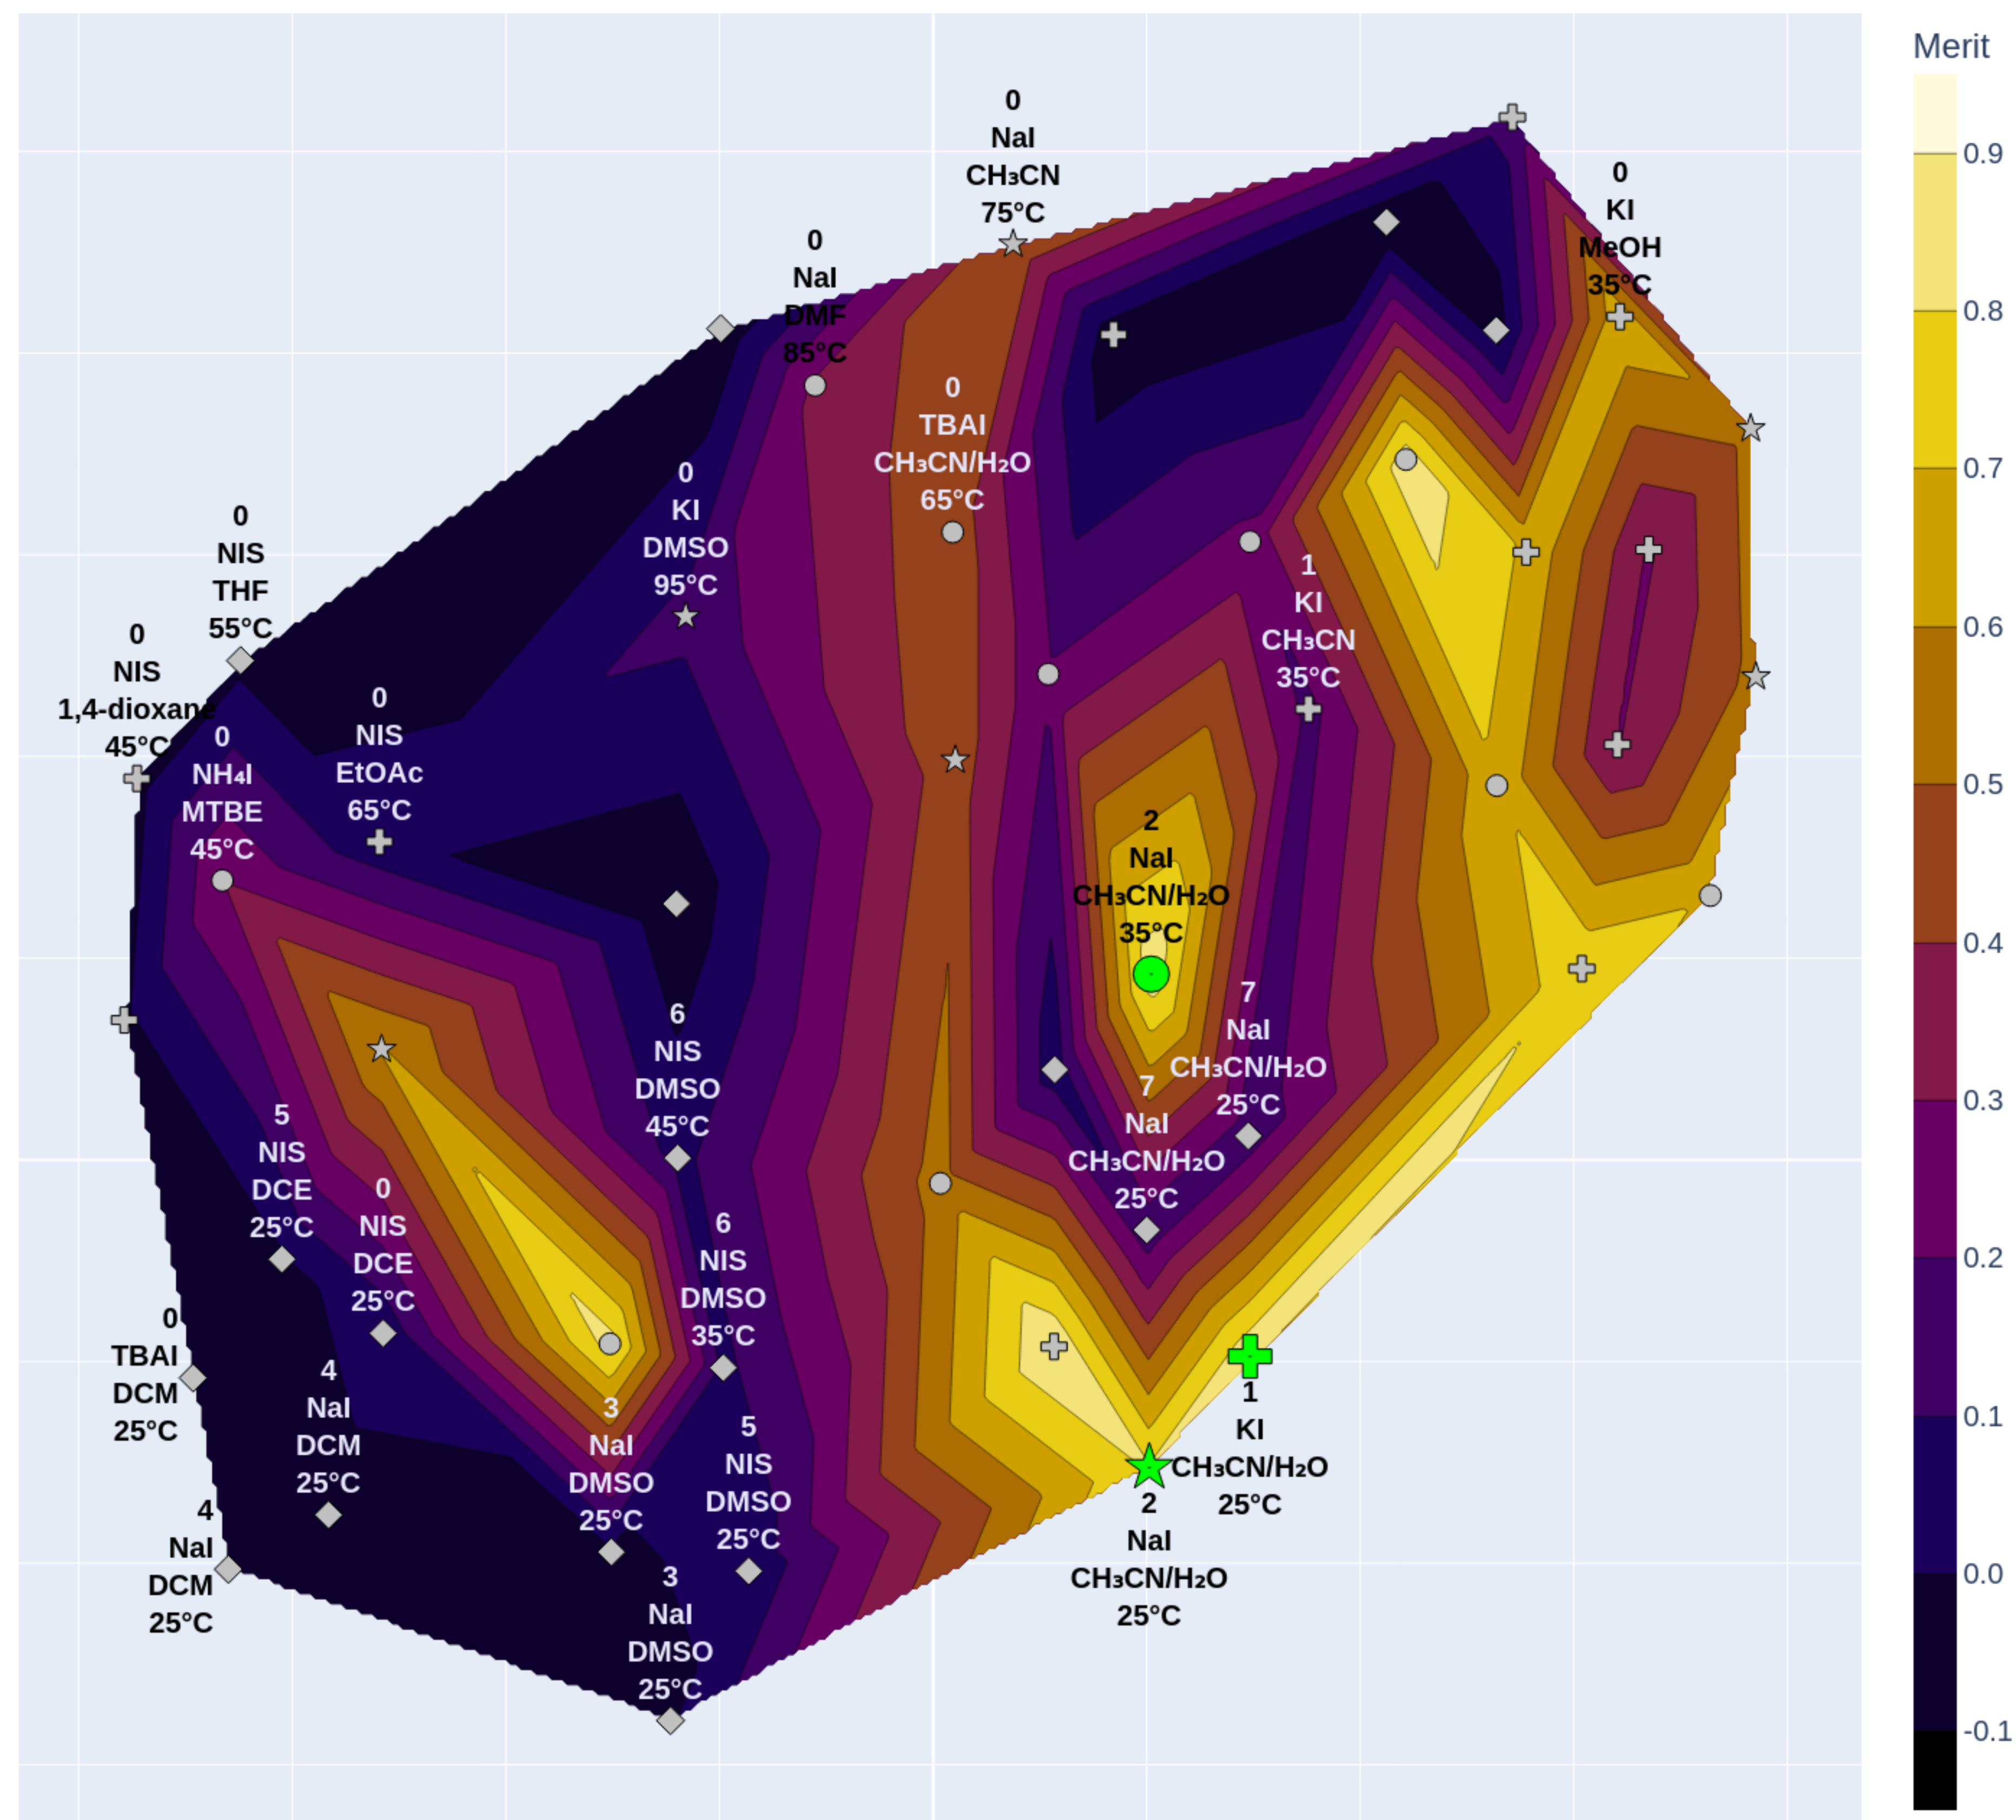

⊕ Observation1-chloro-2-ethynylbenzene  
☆ Observation4-ethynyltoluene  
★ Observation4-ethynyltoluene Converged

● Observation1-chloro-4-ethynylbenzene

⊕ Observation1-chloro-2-ethynylbenzene Converged

⬠ Observation2-ethynyltoluene

● Observation1-chloro-4-ethynylbenzene Converged
