# Supplementary material for: Combining Bayesian optimization and automation to simultaneously optimize reaction conditions and routes
Source: Royal Society of Chemistry journal article supplement (doi:10.1039/d3sc05607d), 2024-01-01
Supplement: d3sc05607d22.pdf [file d3sc05607d22.pdf]

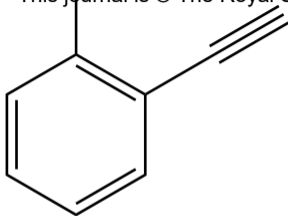

1.5 eq. NIS  
0.1 eq AcOH

18.4ml DCE  
25 °C, 2h

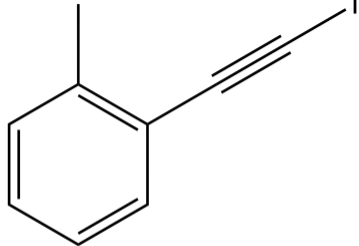

**Conversion: 35%**  
**Yield: 2.8%**
