# Supplementary material for: Combining Bayesian optimization and automation to simultaneously optimize reaction conditions and routes
Source: Royal Society of Chemistry journal article supplement (doi:10.1039/d3sc05607d), 2024-01-01

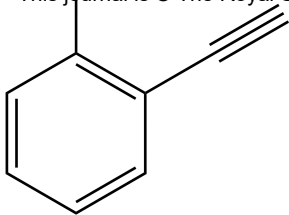

1.3eq NIS  
1.1 eq AcOH

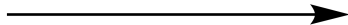

10ml MeCN  
80 °C, 2h

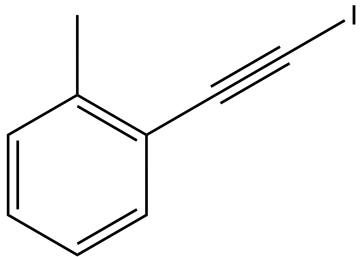

Supplement: d3sc05607d23.pdf [file d3sc05607d23.pdf]
